# Supplementary material
Source: Research Square preprint supplement (doi:10.21203/rs.3.rs-9610002/v1)
Supplement: Supplementary file 1 [file 0d2653db39c654d74f4f6dcd.docx]

**HIGHLIGHTS**

- Smallholder awareness of wildlife conservation is high (88%) but health risk knowledge is low.
- Elephant-cattle interactions predominate (34%) in the Maputo National Park buffer zone.
- Farmers closest to the park (0-3 km) show the greatest knowledge gap regarding zoonoses.
- One Health approaches are essential to bridge the gap between conservation and animal health.
