# Supplementary material
Source: Research Square preprint supplement (doi:10.21203/rs.3.rs-9610002/v1)
Supplement: Supplementary file 2 [file b71c3d97ca4bbefb82f65e99.docx]

# Anexos

## Termo de Consentimento

***DOENÇAS TRANSFRONTEIRIÇAS: IMPACTO NA CONSERVAÇÃO DA BIODIVERSIDADE E SAÚDE DE MANADAS NO PARQUE NACIONAL DE MAPUTO***

**CONSENTIMENTO**

Saudações!

Meu no me é Elio Muatareque, mestrando em Maneio e Conservação da Biodiversidade na Universidade Eduardo Mondlane, estou fazendo uma pesquisa para saber o impacto das doenças em bovinos na conservação da vida selvagem e economia das comunidades do Parque Nacional de Maputo.

Sua participação neste inquérito é voluntaria e pode abortar a qualquer momento. O inquérito durará menos de 10 minutos, não há questões que poderão colocar-lhe em risco. Pedimos-lhe o nome e alguma informação pessoal isto para contactar-lhe para um possível workshop depois da revisão dos resultados. Contudo, suas respostas serão confidenciais, o acesso aos dados originais serão restringidos a equipe de pesquisa e me responsabilizarei de todos dados.

A pesquisa e os ferramentas de colecta de dados (ex. inquérito) foram aprovados pela Comissão de Ética da Faculdade de Engenharia Florestal, tendo alguma questão depois do inquérito não hesite em contactar o pesquisador (dr. E. Muatareque - 862533654/845378133).

Ao assinar este formulário, atesta que leu e percebeu a informação acima apresentada e consente sua participação voluntaria no inquero desta pesquisa.

Nome: _____________________________________________________________________________________

Data: ________/____________/_______ Assinatura: _____________________________________________

## Inquérito Zootécnico

**l**

**IDENTIFICAÇÃO DO INQUIRIDOR**

Nome do Inquiridor: ______________________________________________________________________________________

Data______ de __________________ de 20______ Questionário No. _____________________________________________

Início da entrevista: ________________________ Fim da entrevista: ____________________________________________

Local: ______________________________________________________________________________________________________

**II**

**CARACTERIZAÇÃO SOCIODEMOGRÁFICA**

1. **Localização:**

Província: ______________________________________ Distrito: __________________________________________

Posto Administrativo: ___________________________Localidade: _____________________________________

Latitude: ________________________Longitude: ______________________Interface: ______________________

1. **Identificação:**

Nome/Contacto: _________________________________________________________________________________

Sexo: _______; idade: ____________; período de residência: _____________ Acha que importante conservar a Fauna?________________________________________________________________________________

**II**

**CARACTERIZAÇÃO DOS SISTEMAS DE PRODUÇÃO**

1. **Produção de gado:**
2. Objectivo de criação _________________________________________________________________________
3. Efectivo ______________________________________________________________________________________
4. A quanto tempo cria _________; Comercialização___________; Mercado_________________________
5. Empresta macho para reprodução? __________________________________________________________
6. Tem sistema de registo _______________________ Animais identificados? _______________________
7. O que conseguiu fazer com criação de gado? _____________________________________________________________________________________________________________________________________________________________________________________________________________________________________________________________________________________________
8. **Alimentação do gado:**
9. Como alimenta o gado? _________________________________________________________________
10. Onde o gado come? _____________________________________________________________________
11. Onde o gado bebe? ______________________________________________________________________
12. Escassez de pasto? Como ultrapassou?_________________________________________________________________________________________________________________________________________________________________________
13. Escassez de água? ____________Como ultrapassou?_______________________ ___________________________________________________________________________________________
14. Junta mandas com outros criadores? ________________ Quem pastoreia o gado_____________________________________________________________________________________
15. **Instalações:**
16. Onde o gado passa a noite? ______________________________________________________________
17. Qual o material das instalações__________________ Onde adquiriu? _______________________
18. Isolamento da área (vedação)____________________________________________________________
19. Vias de acesso ___________________________________________________________________________
20. **Sanidade:**
21. Reconhece alguns sinais de doença? ____________________________________________________
22. Quais___________________________________________________________________________________________________________________________________________________________________________________________________________________________________________________________________________
23. Qual tem sido o desfecho________________________; Perdeu animais por morte_______________________; Quantos? __________________________________________________
24. Teve ajuda? ______________________; Quem interveio?______________________________________
25. Sabe das doenças na região: _________________________________________; Quais: _________________________________________________________________________________________________________________________________________________________________________________________________________________________________________________________________________________
26. O que faz quando o animal fica doente ? _________________________________________________
27. Ocorrem abortos? _______________________________________________________________________
28. Que tratamento dá ao material abortado? _______________________________________________
29. As doenças são constantes? _____; Desde quando começou observar____________________
30. **Custos de produção:**
31. Quem compra os fármacos? ______________________; Aonde _______________________________
32. Já teve assistência veterinária? ________________; Sua filiação ______________________________
33. Que produtos fornece____________________________________________________________________
34. Para que actividade produtiva gasta mais ________________________________________________
35. Houve alteração no rendimento desde que observou as doenças? ____________________ Qual?_____________________________________________________________________________________
36. **Efeito das interacções:**
37. Já viu animais bravios? __________________________________________________________________;
38. Partilham: água de abeberamento e áreas de pastagem com bovinos? _______________________________________________________
39. Que espécies invadem os recursos (alheios)? ____________________________________________
40. Já enfrentou escassez de carne bovina? __________________; Qual foi alternativa ___________________________________________________________________________________________
41. Onde adquire? ___________________________________________________________________________
42. Sabe o perigo da interacção fauna bravia e o gado? _____________________________________; Quais?_____________________________________________________________________________________________________________________________________________________________________________________________________________________________________________________________________________________________________________________________________________________________________
43. Há campanhas organizadas pelo PNAM? _______________________________________________
44. Quais aspectos abordados? _____________________________________________________________

_______________________________________________________________________________________________

_______________________________________________________________________________________________
